# Supplementary material
Source: HighWire-hosted journal article supplement (http://www.annfammed.org/highwire/filestream/8008/field_highwire_adjunct_files/0/Krul_Supp_App.pdf)
Supplement: Krul_Supp_App.pdf [file Krul_Supp_App.pdf]

**Online Supplementary Material**

Krul M, van der Wouden JC, Schellevis FG, van Suijlekom-Smit LWA, Koes BW. Musculoskeletal problems in overweight and obese children. *Ann Fam Med*. 2009;7(4):352-356.

<http://www.annfammed.org/cgi/content/full/7/4/352/DC1>

---

**Supplemental Appendix. *International Classification of Primary Care* Codes Used to Identify Musculoskeletal Problems**

**Neck and back problems**

- L01 Neck symptom/complaint
- L02 Back symptom/complaint
- L03 Low back symptom/complaint
- L83 Neck syndrome
- L84 Back syndrome w/o radiating pain
- L85 Acquired deformity of spine
- L85 Back syndrome with radiating pain

**Upper extremity**

- L08 Shoulder symptom/complaint
- L09 Arm symptom/complaint
- L10 Elbow symptom/complaint
- L11 Wrist symptom/complaint
- L12 Hand/finger symptom/complaint
- L72 Fracture radius/ulna
- L92 Shoulder syndrome
- L93 Tennis elbow

**Lower extremity**

- L13 Hip symptom/complaint
- L14 Leg/thigh symptom/complaint
- L15 Knee symptom/complaint
- L16 Ankle symptom/complaint
- L17 Foot/toe symptom/complaint
- L73 Fracture tibia/fibula
- L75 Fracture femur
- L77 Sprain strain of ankle
- L78 Sprain strain of knee
- L96 Acute internal damage knee
